# Supplementary material for: Gender, Contraceptives and Individual Metabolic Predisposition Shape a Healthy Plasma Lipidome
Source: PubMed Central journal article supplement (PMC4906355; doi:10.1038/srep27710), 2016-06-14
Supplement: srep27710-s1.pdf [file srep27710-s1.pdf]

## **Supplementary Materials**

for the manuscript by S.Sales, J.Graessler, S.Ciucci, R.Al-Atrib, T.Vihervaara, K.Schuhmann, D.Kauhanen, M.Sysi-Aho, S.R.Bornstein, M.Bickle, C.V.Cannistraci, K.Ekroos and A.Shevchenko  
"Gender, Contraceptives and Individual Metabolic Predisposition Shape a Healthy Plasma Lipidome"

### **Table of Content**

**Supplementary Table S1** Basal characteristics of the study cohort (extended table).

**Supplementary Table S5** Exclusion criteria and gender-specific causes for exclusion from the study

**Supplementary Figure S1:** Concentrations of individual lipid species

**Supplementary Figure S2** Total concentrations of lipid classes.

**Supplementary Figure S3** Values of clinical and anthropometric indices.

**Supplementary Tables S2, S3 and S4** are Excel spreadsheets and uploaded as separate files.

**Supplementary Table 1.** Basal characteristics of the study cohort (extended table).

| Parameter                    | units             | Men (n=36) |       |             | Women (n=35) |       |             | Mann-WhitneyTest<br>Benjamini corrected (p) |
|------------------------------|-------------------|------------|-------|-------------|--------------|-------|-------------|---------------------------------------------|
|                              |                   | Mean       | SD    | 95% CI      | Mean         | SD    | 95% CI      |                                             |
| Age                          | years             | 24.0       | 2.7   | 23.1-24.9   | 25.5         | 2.8   | 24.5-26.4   | 0.0244                                      |
| Weight                       | kg                | 77.2       | 8.8   | 74.2-80.1   | 61.6         | 7.9   | 58.9-64.3   | 3.418E-08                                   |
| Height                       | m                 | 1.82       | 0.06  | 1.80-1.84   | 1.70         | 0.06  | 1.68-1.72   | 3.756E-08                                   |
| BMI                          | Kg/m <sup>2</sup> | 23.4       | 2.4   | 22.6-24.2   | 21.3         | 2.2   | 20.6-22.0   | 0.001                                       |
| Waist                        | cm                | 80.6       | 8.2   | 77.8-83.3   | 69.3         | 6.6   | 67.0-71.6   | 4.569E-08                                   |
| Hip                          | cm                | 101.8      | 6.4   | 99.6-103.9  | 100.2        | 6.1   | 98.0-102.3  | 0.1374                                      |
| Waist-to-hip ratio           |                   | 0.79       | 0.05  | 0.77-0.81   | 0.69         | 0.06  | 0.67-0.71   | 5.021E-09                                   |
| Systolic blood pressure      | mmHg              | 122.5      | 9.4   | 119.3-125.7 | 113.4        | 8.7   | 110.4-116.4 | 0.0003                                      |
| Diastolic blood pressure     | mmHg              | 69.9       | 7.2   | 67.4-72.3   | 65.4         | 6.1   | 63.3-67.5   | 0.009                                       |
| Triglycerides                | mmol/L            | 0.78       | 0.27  | 0.69-0.87   | 0.83         | 0.26  | 0.74-0.92   | 0.205                                       |
| Total cholesterol            | mmol/L            | 4.23       | 0.55  | 4.04-4.41   | 4.57         | 0.47  | 4.41-4.73   | 0.205                                       |
| LDL-cholesterol              | mmol/L            | 2.44       | 0.54  | 2.25-2.62   | 2.40         | 0.49  | 2.23-2.57   | 0.377                                       |
| HDL-cholesterol              | mmol/L            | 1.55       | 0.31  | 1.45-1.66   | 1.93         | 0.31  | 1.83-2.04   | 2.262E-05                                   |
| Hemoglobin                   | mmol/L            | 9.47       | 0.60  | 9.27-9.68   | 8.34         | 0.51  | 8.16-8.51   | 7.106E-09                                   |
| Hematocrit                   |                   | 0.44       | 0.02  | 0.43-0.45   | 0.39         | 0.02  | 0.39-0.40   | 2.9E-09                                     |
| Leukocytes                   | GPt/L             | 5.50       | 1.03  | 5.15-5.84   | 5.57         | 1.20  | 5.16-5.98   | 0.384                                       |
| Platelets                    | GPt/L             | 216.4      | 45.1  | 201.2-231.7 | 245.8        | 49.5  | 228.8-262.8 | 0.009                                       |
| Erythrocytes                 | TPt/L             | 5.05       | 0.25  | 4.97-5.14   | 4.49         | 0.26  | 4.40-4.58   | 7.859E-09                                   |
| Creatinine                   | μmol/L            | 84.1       | 10.4  | 80.6-87.7   | 71.7         | 6.9   | 69.3-74.0   | 1.37E-06                                    |
| Alanine aminotransaminase    | μmol/L*s          | 0.37       | 0.14  | 0.32-0.41   | 0.25         | 0.10  | 0.22-0.29   | 0.0002                                      |
| Gamma-glutamyltransferase    | μmol/L*s          | 0.30       | 0.11  | 0.26-0.34   | 0.27         | 0.13  | 0.22-0.31   | 0.029                                       |
| Uric acid                    | μmol/L            | 334.5      | 59.4  | 314.4-354.6 | 233.8        | 36.7  | 221.2-246.4 | 2.9E-09                                     |
| C-reactive protein           | mg/L              | 0.65       | 0.75  | 0.39-0.90   | 1.33         | 1.49  | 0.81-1.84   | 0.055                                       |
| Hemoglobin A1c               | %                 | 5.17       | 0.31  | 5.07-5.28   | 5.21         | 0.21  | 5.14-5.28   | 0.328                                       |
| Plasma glucose               | mmol/L            | 4.54       | 0.36  | 4.42-4.66   | 4.49         | 0.30  | 4.39-4.60   | 0.282                                       |
| Free fatty acids             | mmol/L            | 0.31       | 0.16  | 0.26-0.37   | 0.37         | 0.19  | 0.30-0.43   | 0.137                                       |
| Proinsulin                   | pmol/L            | 2.10       | 1.54  | 1.58-2.62   | 2.15         | 1.84  | 1.51-2.78   | 0.386                                       |
| C-peptide                    | pmol/L            | 548.9      | 216.3 | 475.7-622.1 | 597.7        | 190.9 | 532.2-663.3 | 0.116                                       |
| Insulin                      | pmol/L            | 48.3       | 26.6  | 39.3-57.3   | 58.3         | 40.8  | 44.3-72.3   | 0.115                                       |
| Thyroid-stimulating-hormone  | mU/L              | 2.84       | 1.81  | 2.22-3.45   | 2.60         | 1.15  | 2.21-2.99   | 0.382                                       |
| Luteinizing hormone          | U/L               | 3.37       | 1.12  | 2.99-3.75   | 3.16         | 2.77  | 2.21-4.11   | 0.054                                       |
| Follicle-stimulating hormone | U/L               | 2.76       | 1.62  | 2.21-3.31   | 3.83         | 3.11  | 2.76-4.90   | 0.12                                        |
| Cortisol                     | nmol/L            | 433.5      | 116.7 | 394.0-472.9 | 446.0        | 156.6 | 392.2-499.8 | 0.367                                       |
| Dehydroepiandrosterone       | nmol/L            | 26.5       | 10.2  | 23.0-29.9   | 24.5         | 12.3  | 20.3-28.8   | 0.176                                       |
| Sex hormone-binding globulin | nmol/L            | 22.4       | 7.4   | 19.9-24.9   | 94.0         | 66.8  | 71.1-117.0  | 5.021E-09                                   |

**Supplementary Table S5.**  
Exclusion criteria and gender-specific causes for exclusion from the study

| Parameter                           | units    | Cut-off values          | Excluded Individuals (n) |                     |
|-------------------------------------|----------|-------------------------|--------------------------|---------------------|
|                                     |          |                         | <i>Males (12)</i>        | <i>Females (20)</i> |
| Blood pressure (systolic/diastolic) | mmHg     | > 140 / 85              |                          |                     |
| ALAT                                | μmol/L*s | > 0.80                  |                          |                     |
| γGT                                 | μmol/L*s | > 0.80                  |                          |                     |
| Serum creatinine                    | μmol/L   | > 110 men / > 95 women  |                          |                     |
| C-reactive protein                  | mg/L     | > 5                     | <b>3</b>                 | <b>2</b>            |
| Hemoglobin                          | mmol/L   | < 8.0 men / < 7.4 women |                          |                     |
| HbA <sub>1C</sub>                   | %        | > 5.7                   |                          |                     |
| Total cholesterol <sup>1</sup>      | mmol/L   | > 5.2                   | <b>5</b>                 | <b>14</b>           |
| LDL-cholesterol <sup>1</sup>        | mmol/L   | > 4.0                   |                          |                     |
| HDL-cholesterol <sup>1</sup>        | mmol/L   | < 0.9 men / < 1.1 women |                          |                     |
| Triglycerides <sup>1</sup>          | mmol/L   | > 1.7                   | <b>2</b>                 |                     |
| Plasma glucose <sup>1</sup>         | mmol/L   | > 5.5                   |                          |                     |
| Plasma insulin <sup>1</sup>         | pmol/L   | > 250                   |                          | <b>1</b>            |
| Uric acid <sup>1</sup>              | μmol/L*s | > 490                   | <b>1</b>                 |                     |

<sup>1</sup> values after 12h overnight fasting; ALAT: alanine aminotransferase, γGT: gamma glutamyltransferase, HbA<sub>1C</sub>: glycosylated hemoglobin

One male individual was excluded due to missing data; two females were excluded due to taking iron preparations; one due to lactation

Supplementary Figure S1

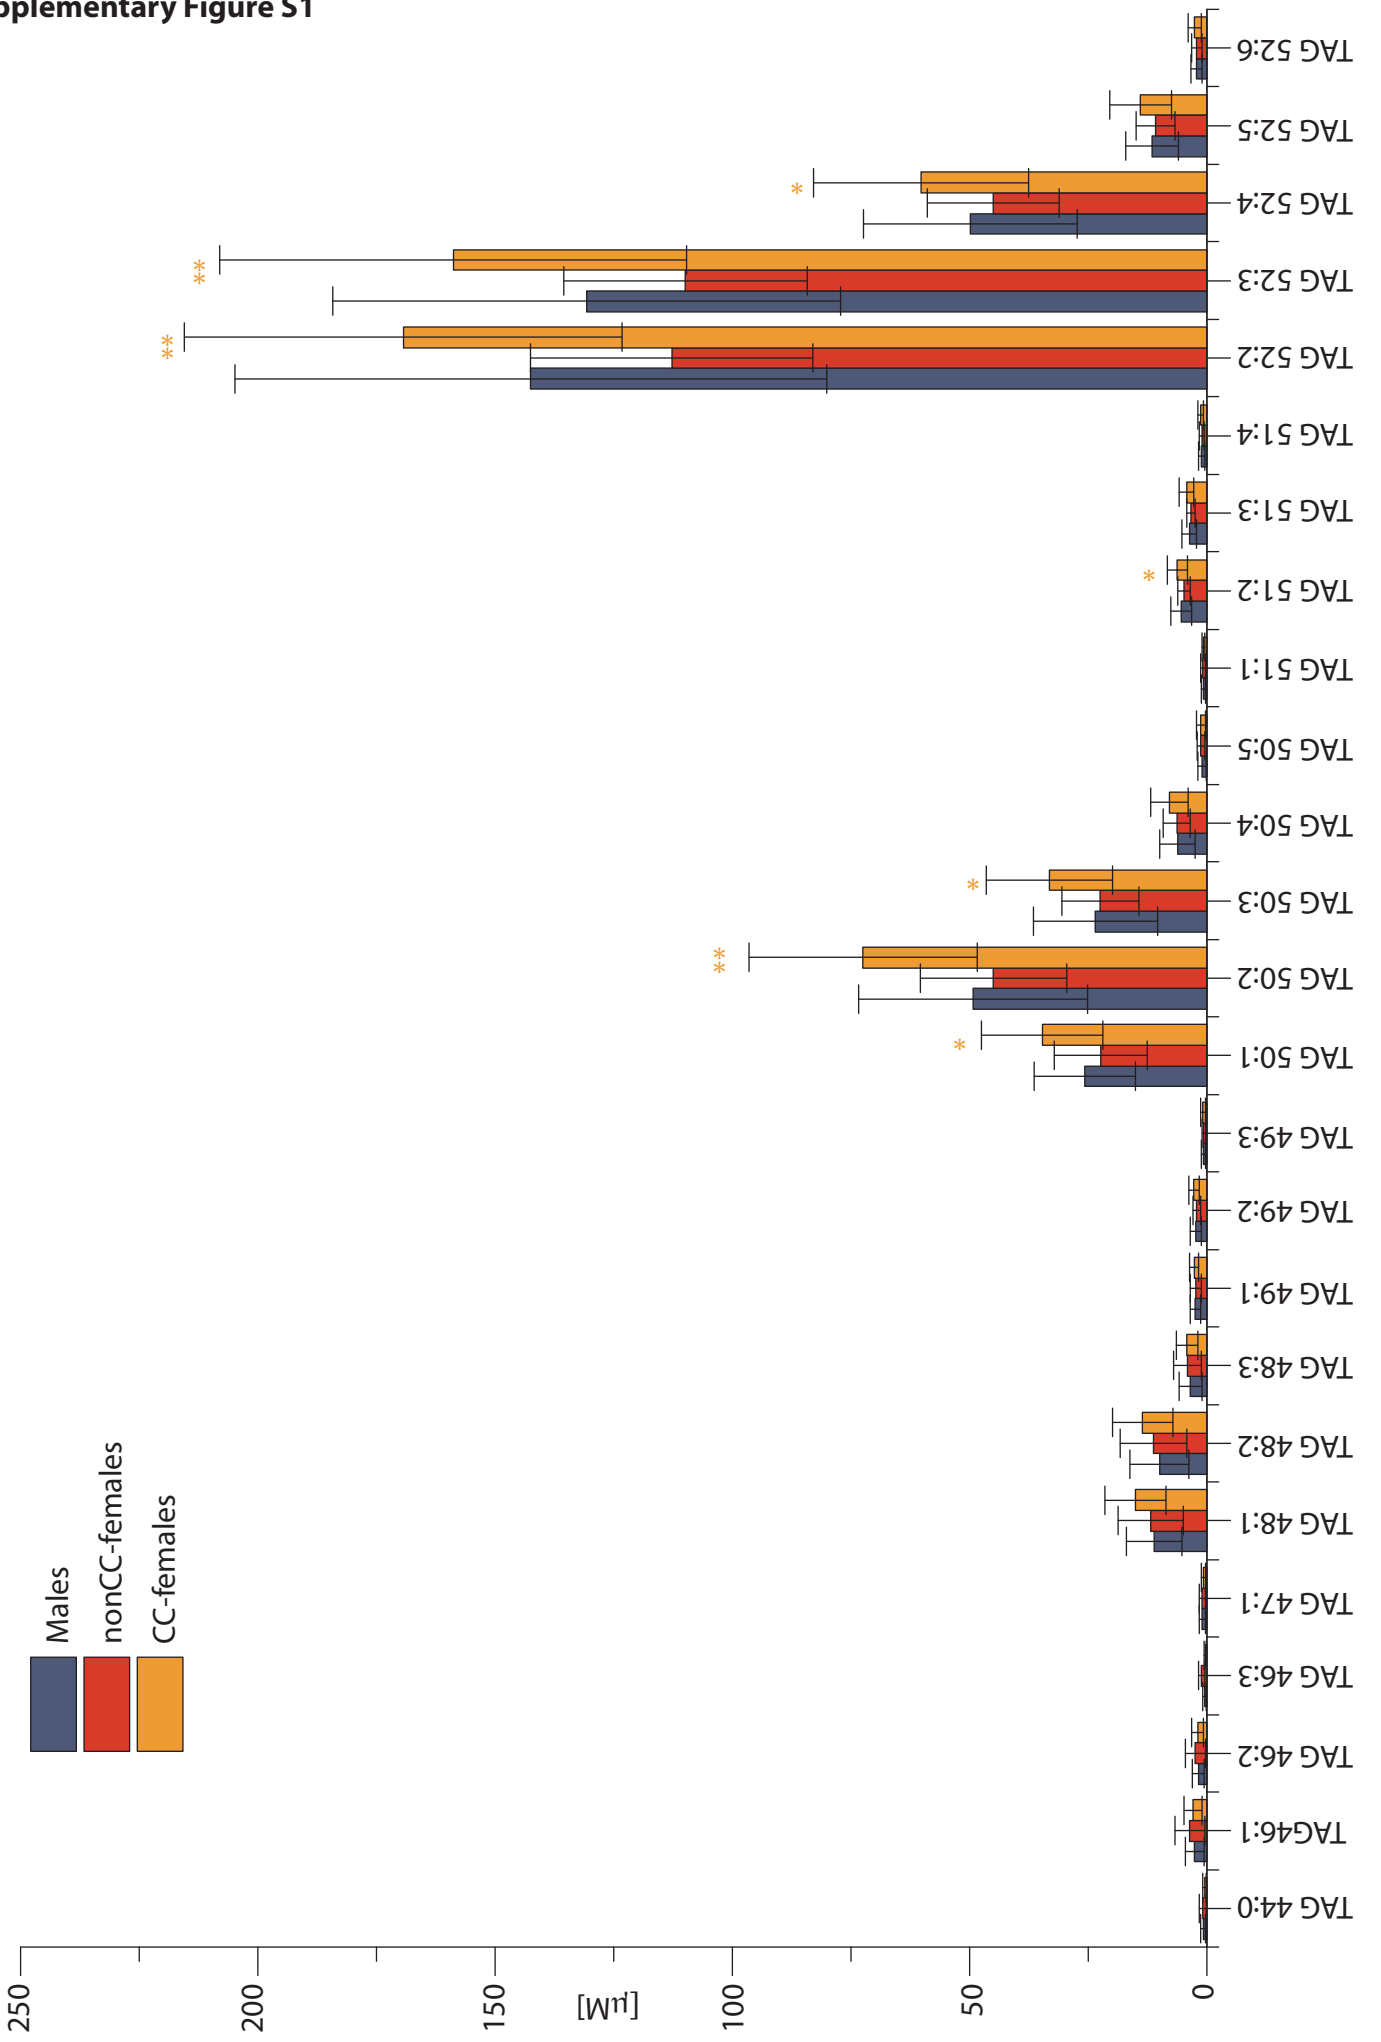

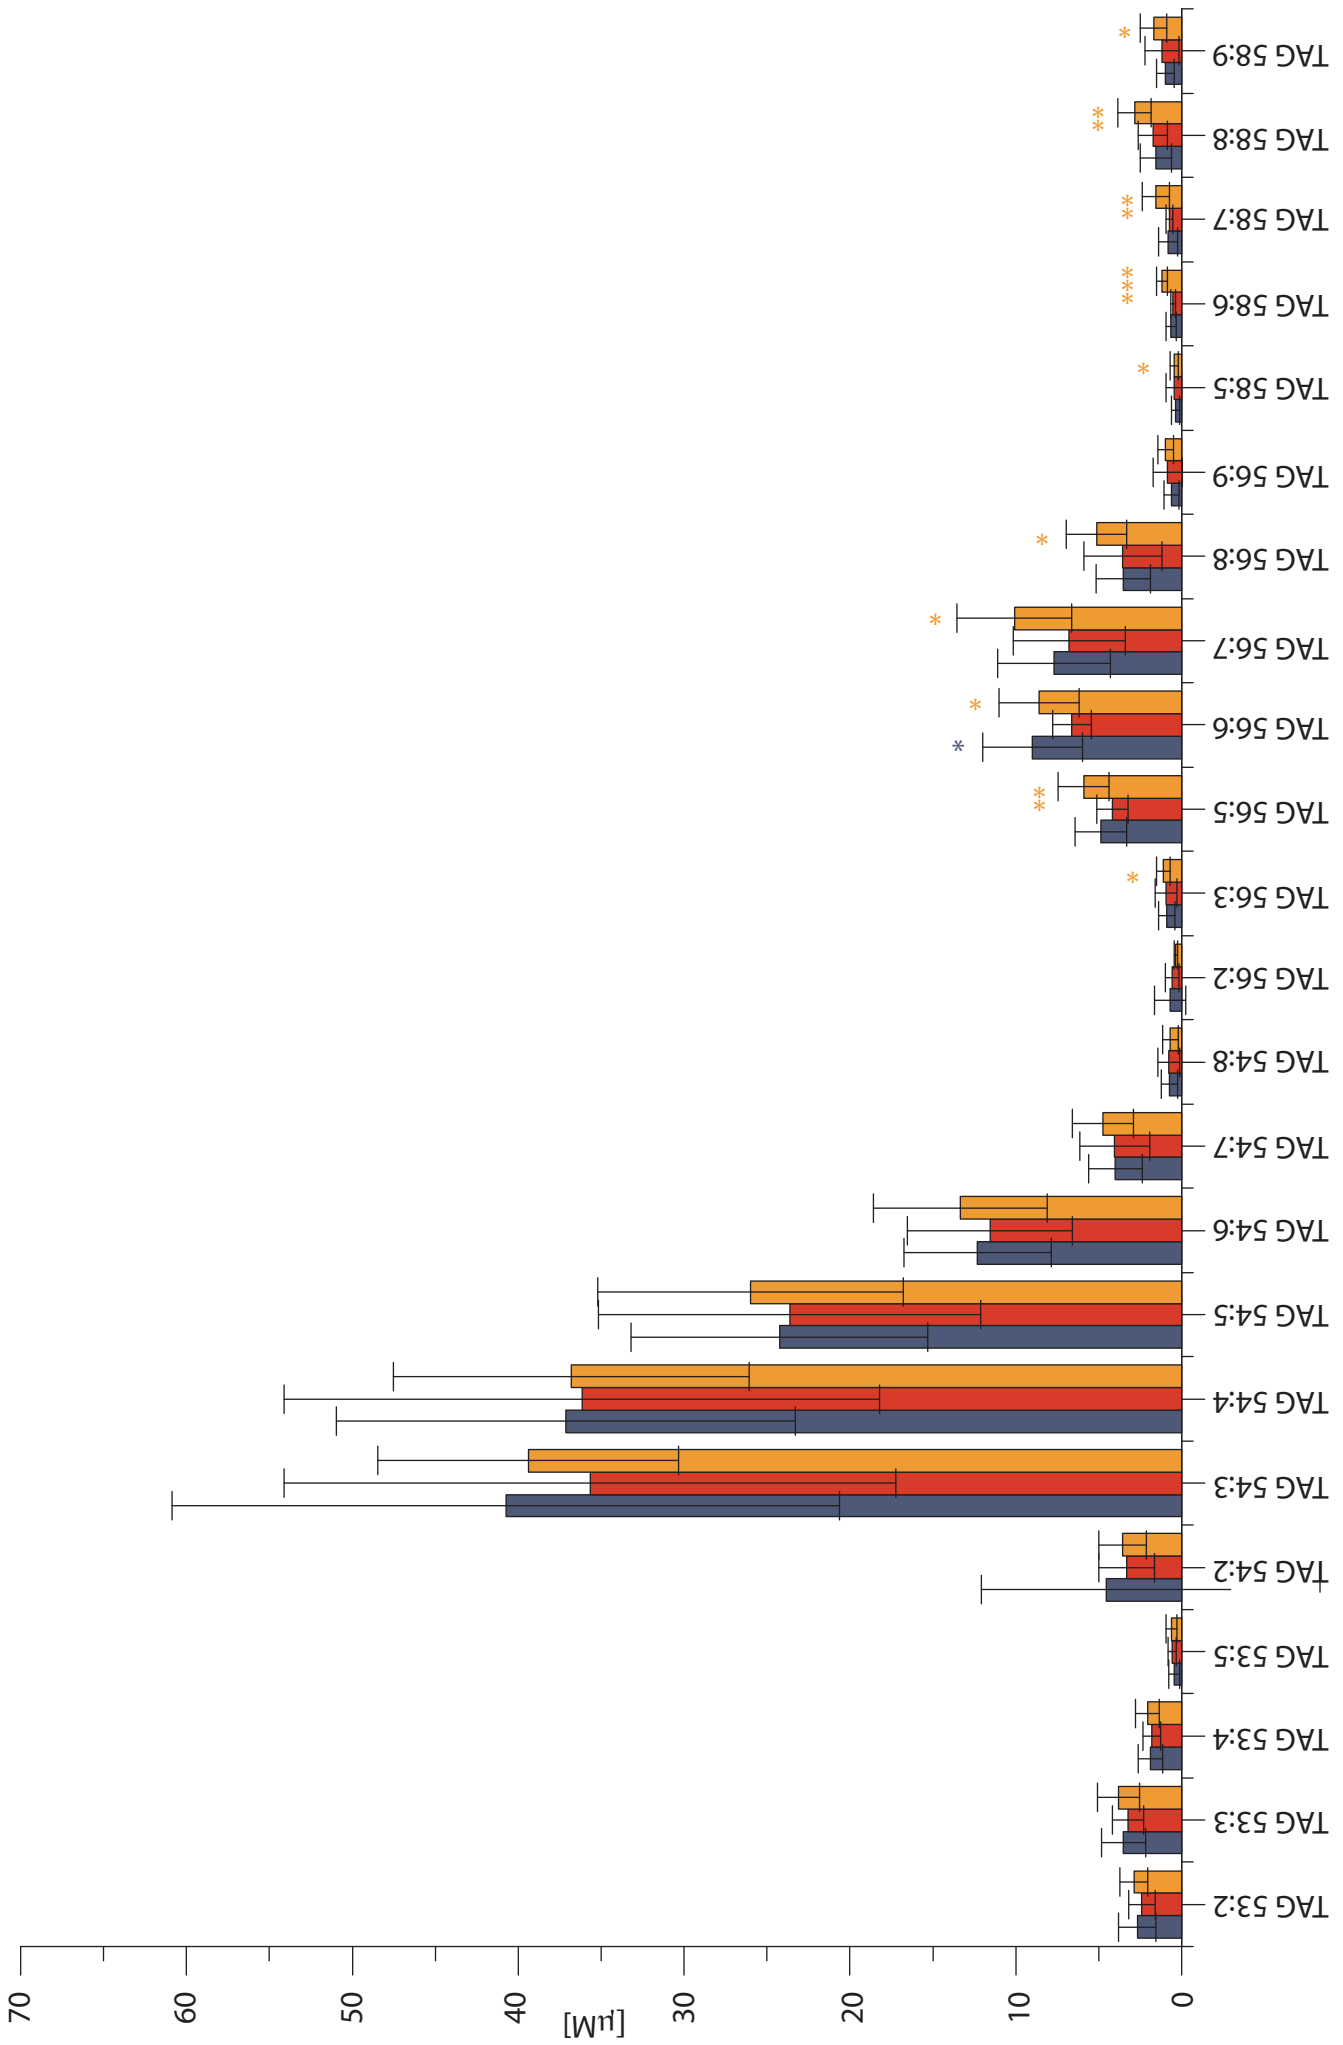

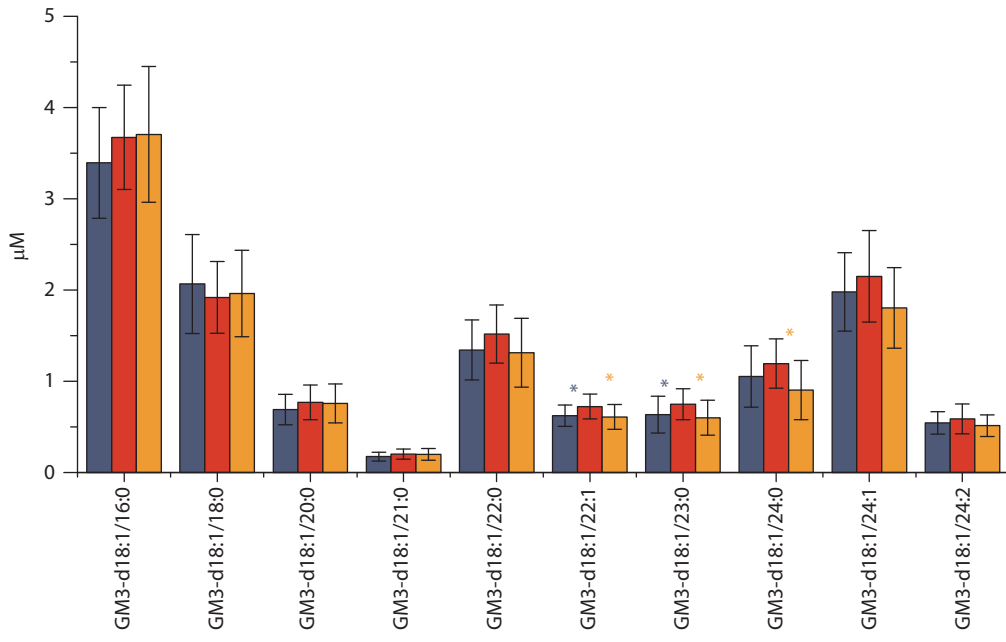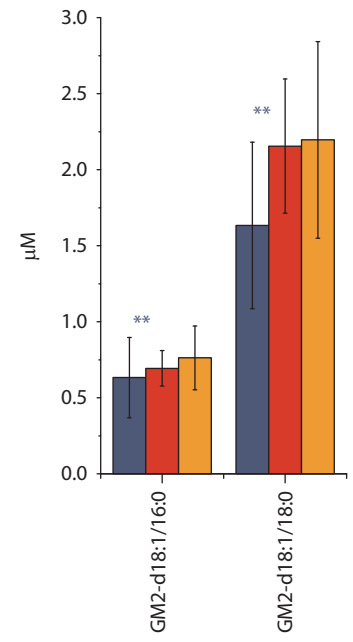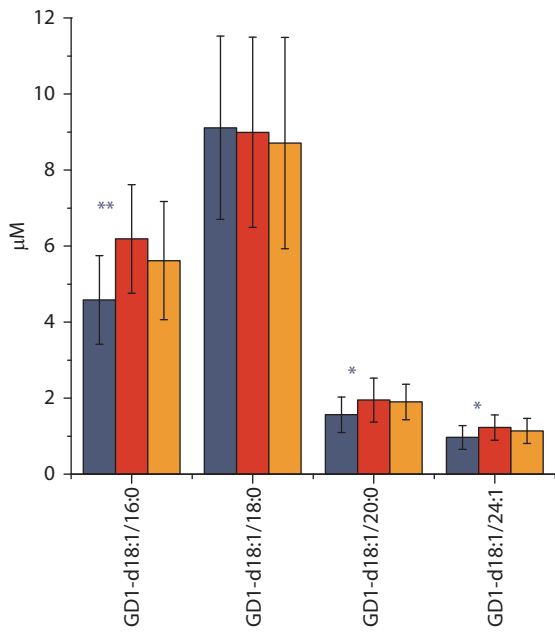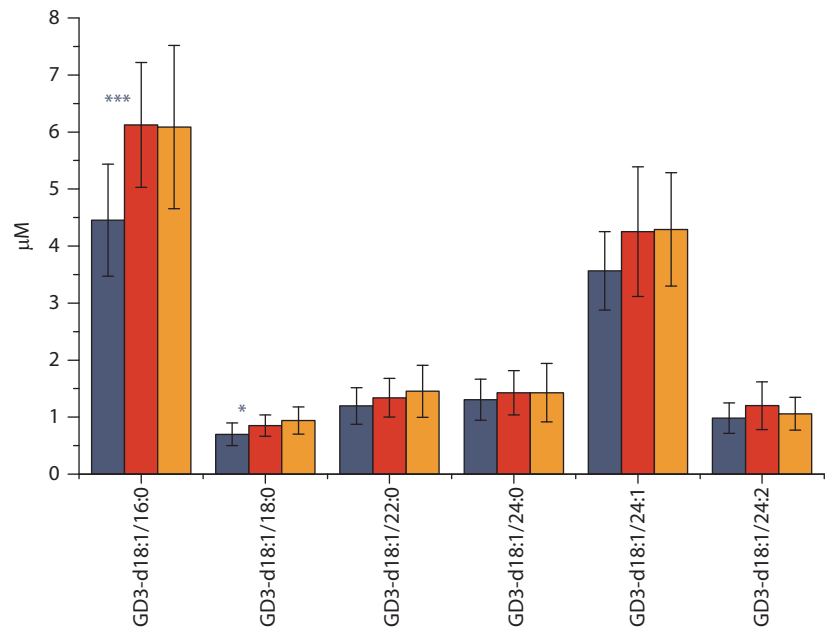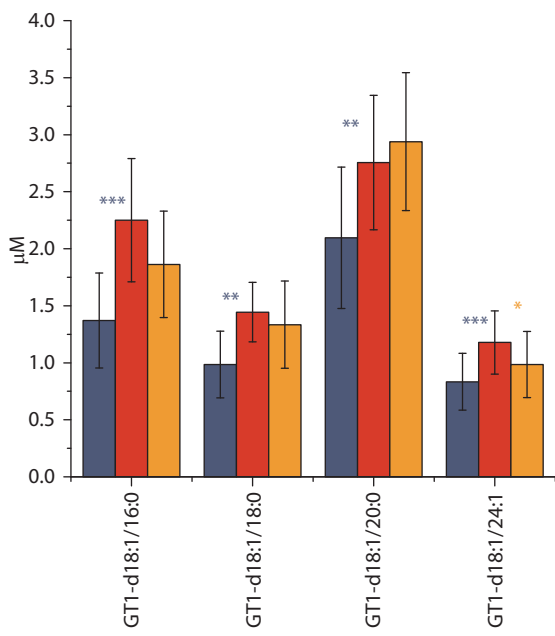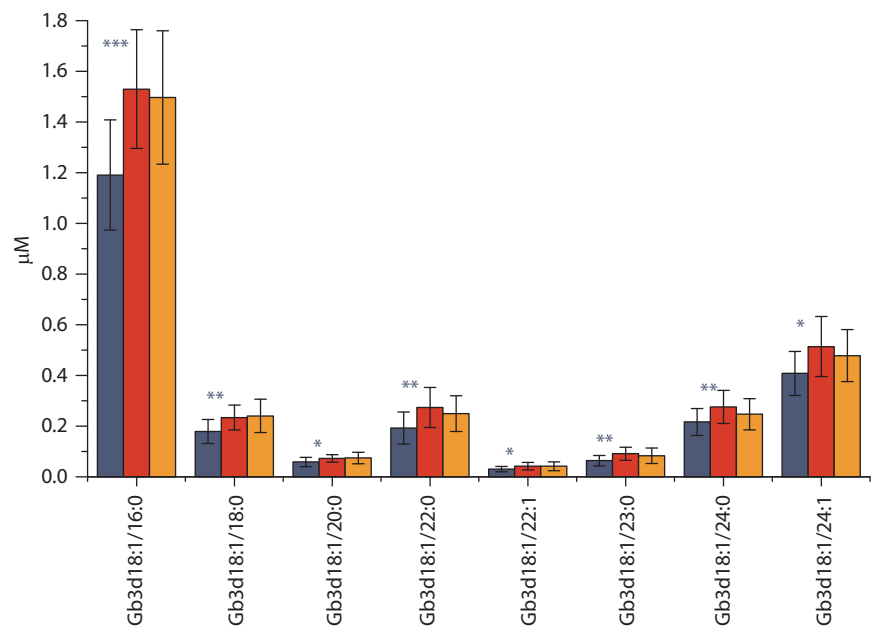

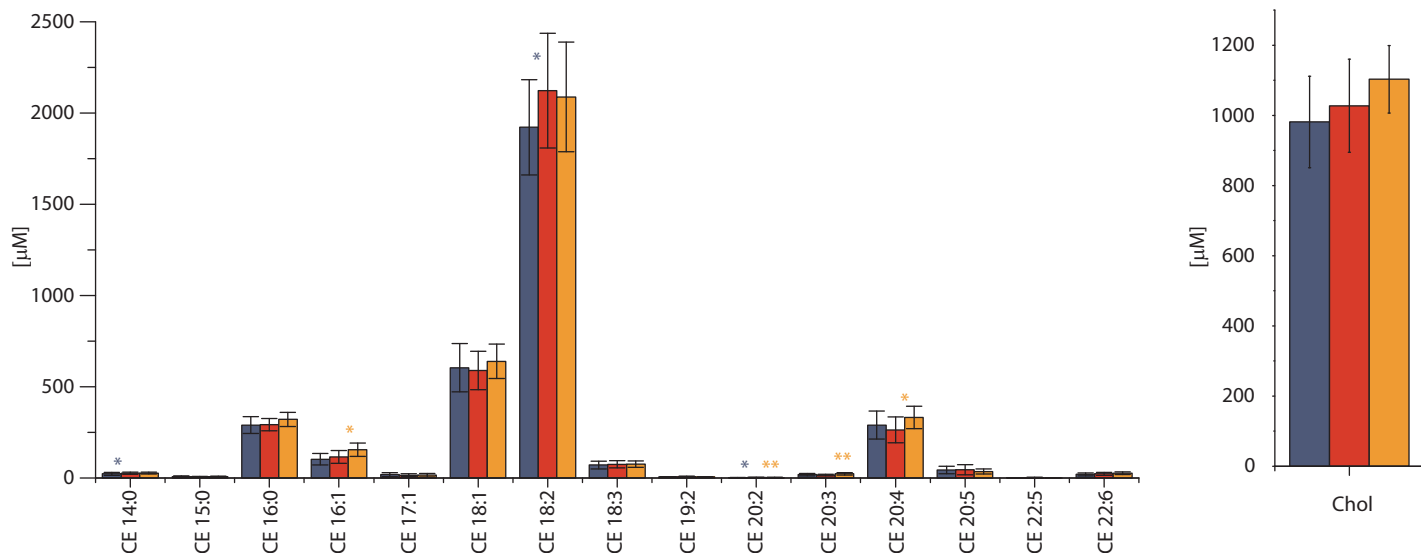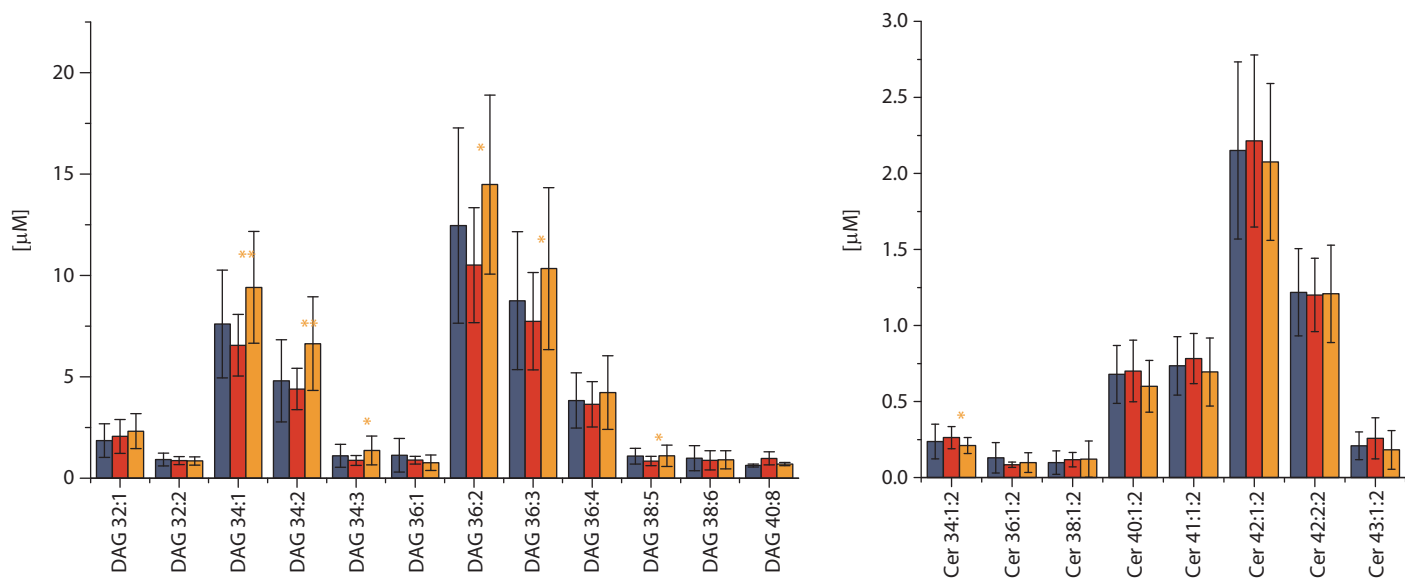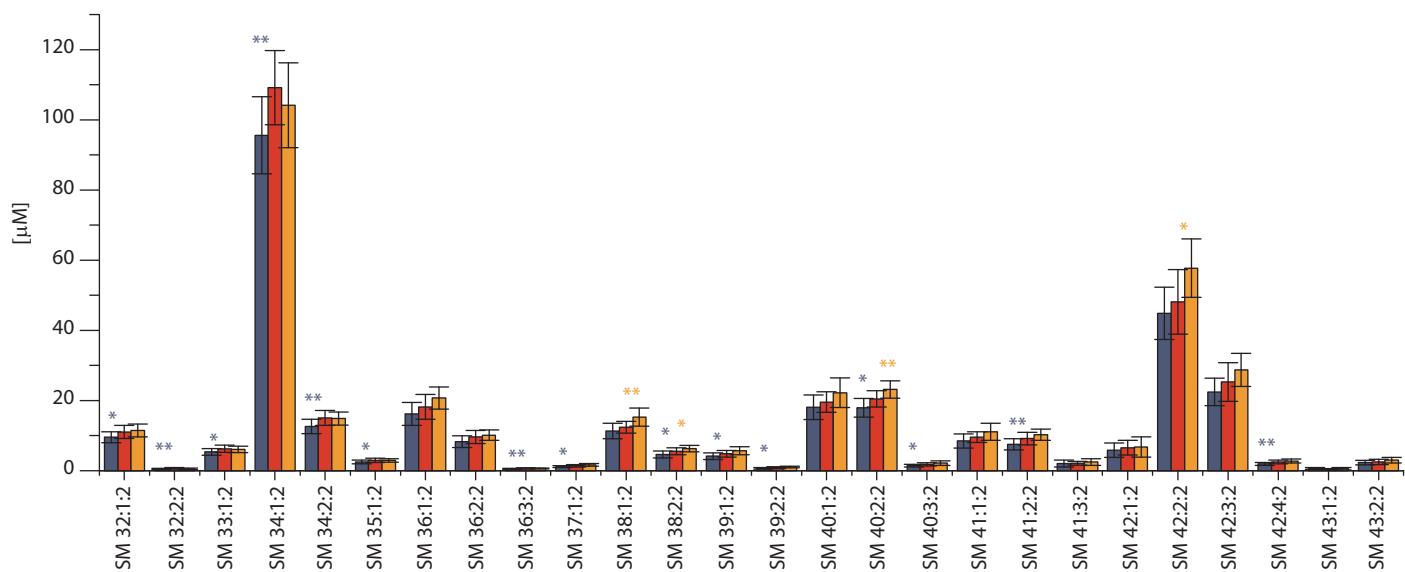

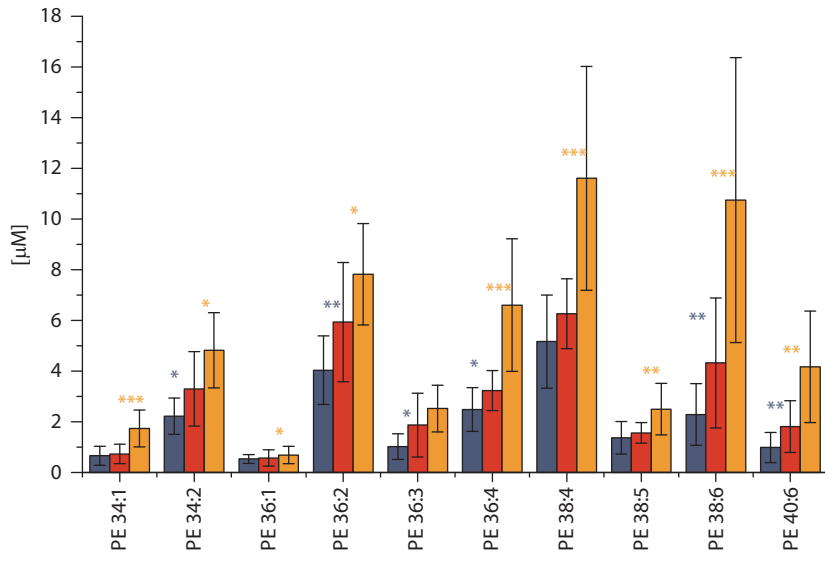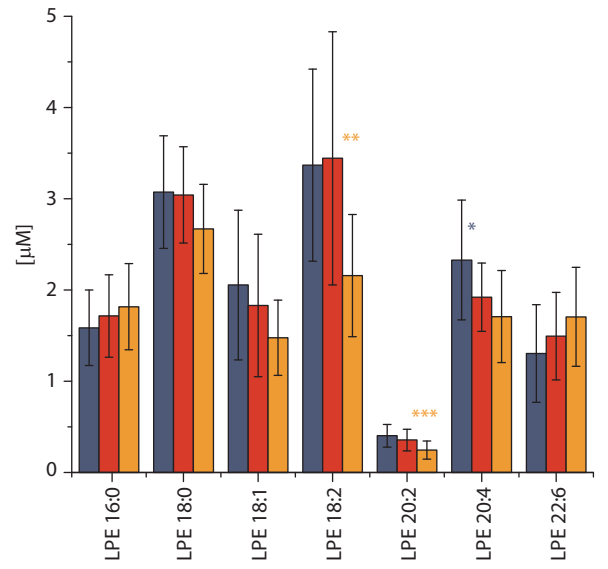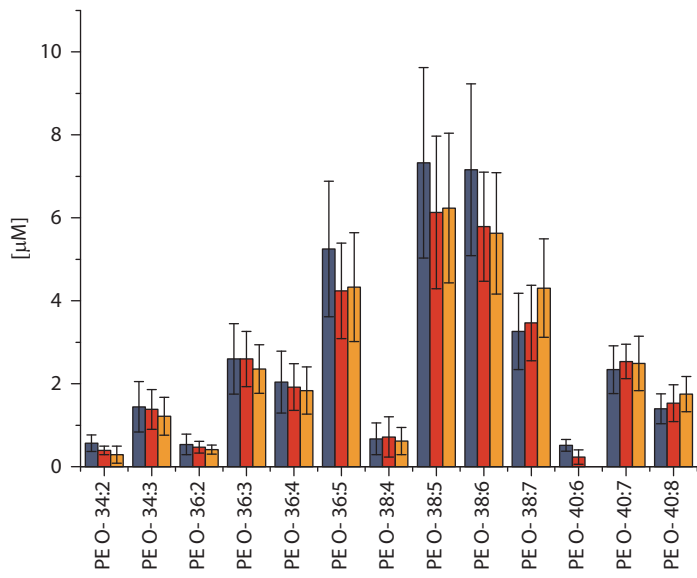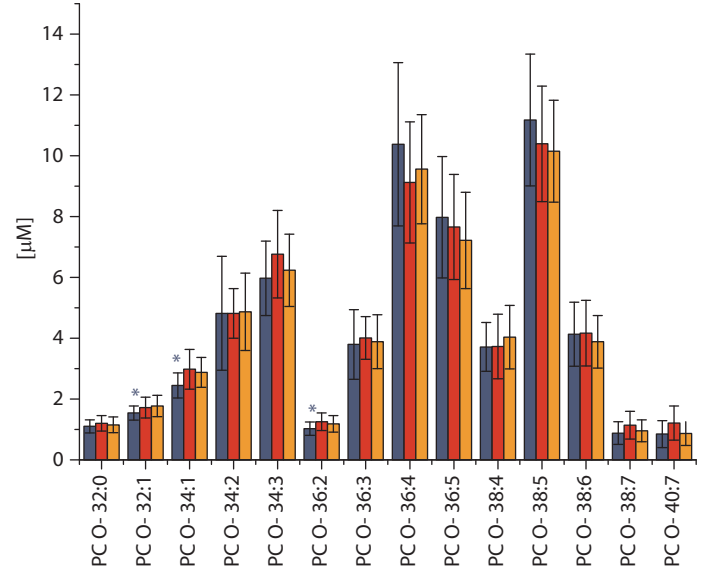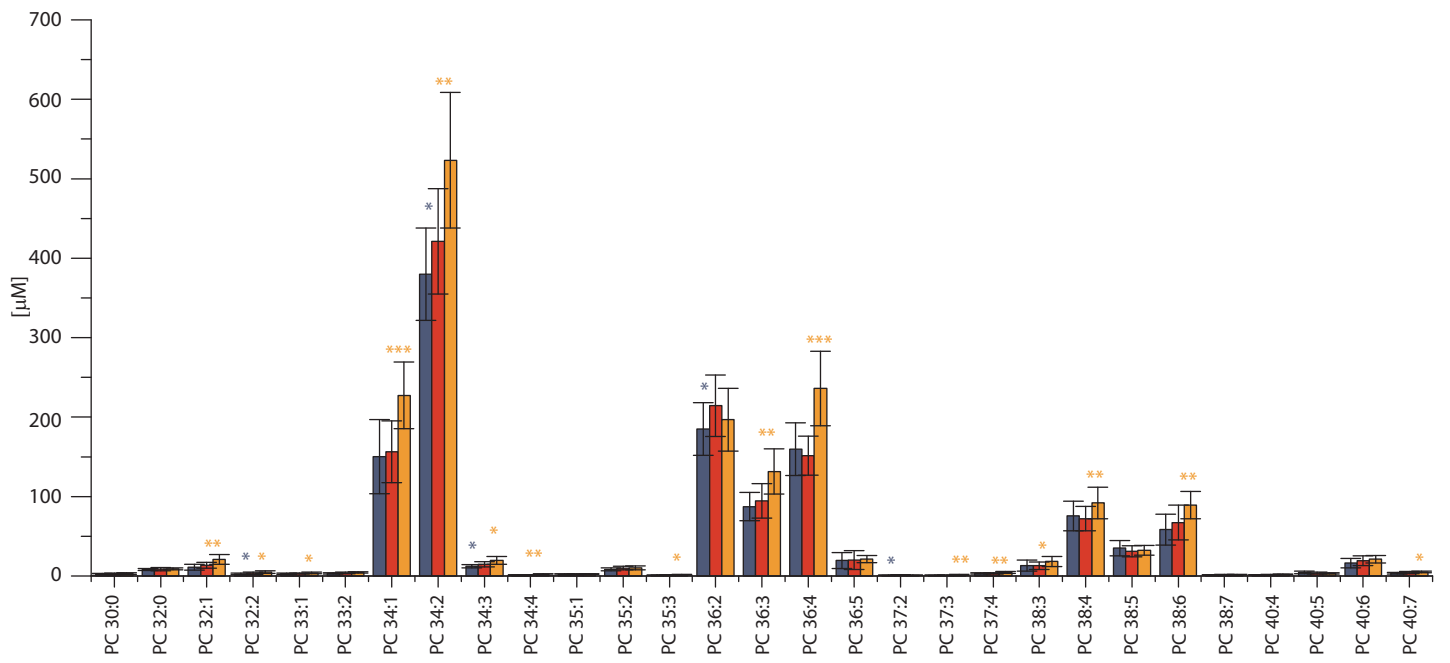



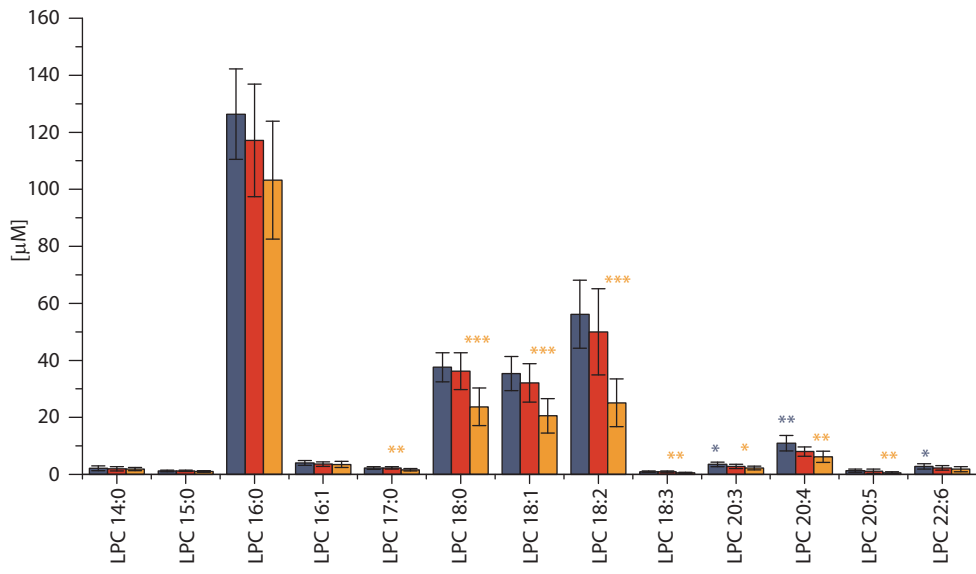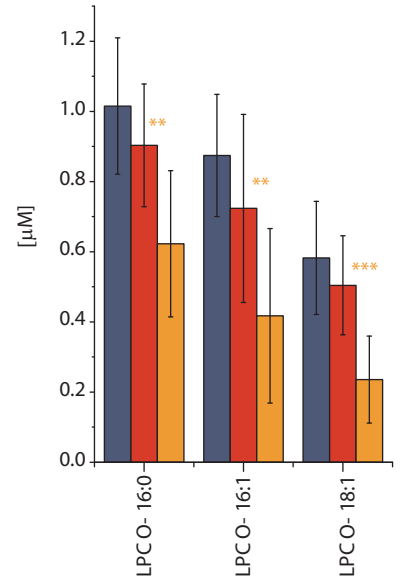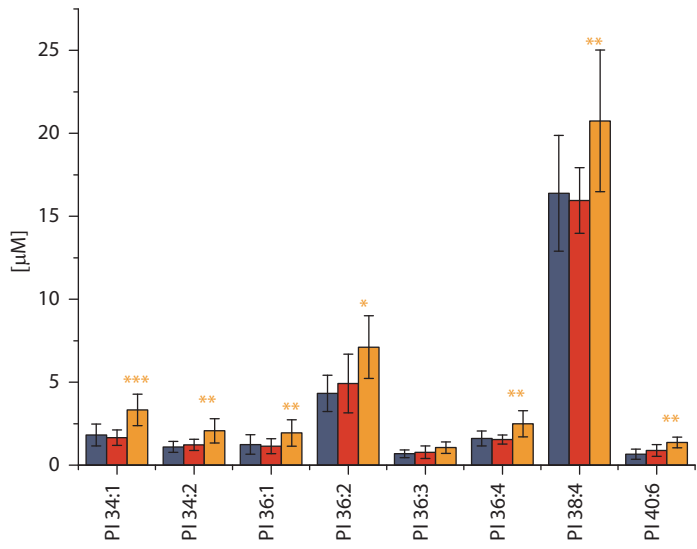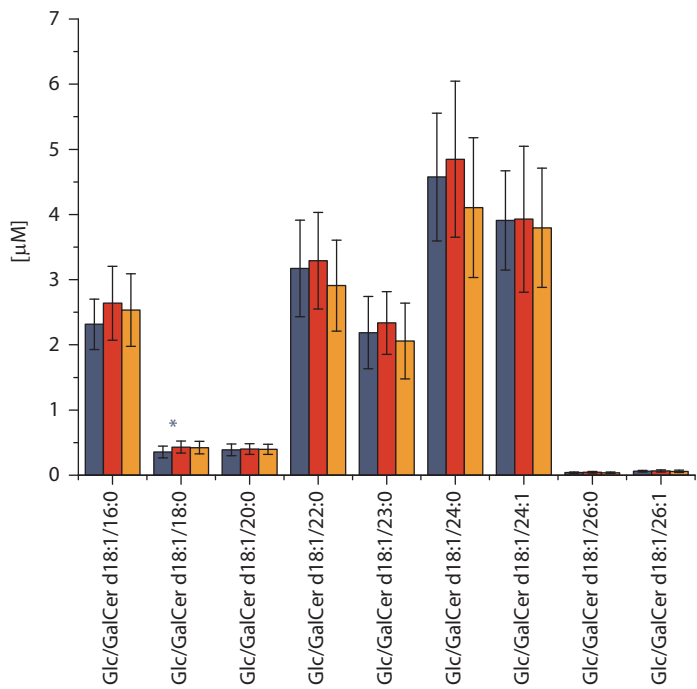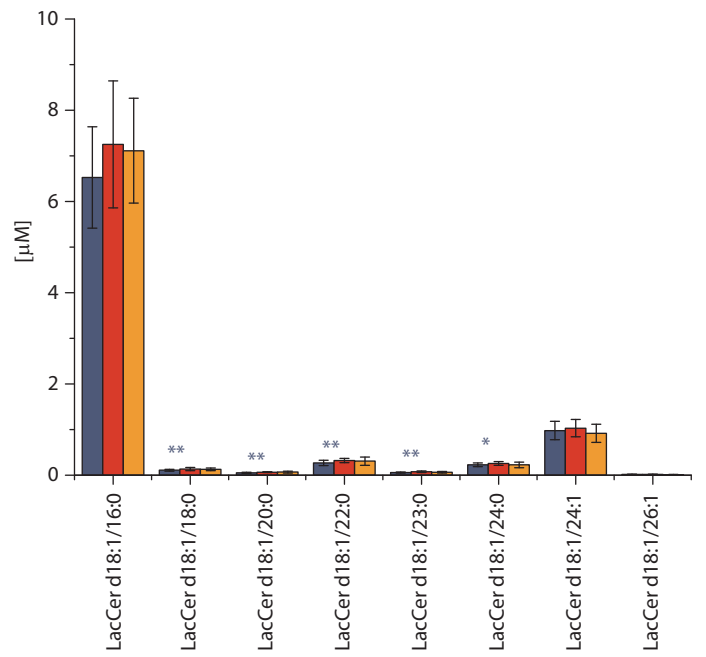

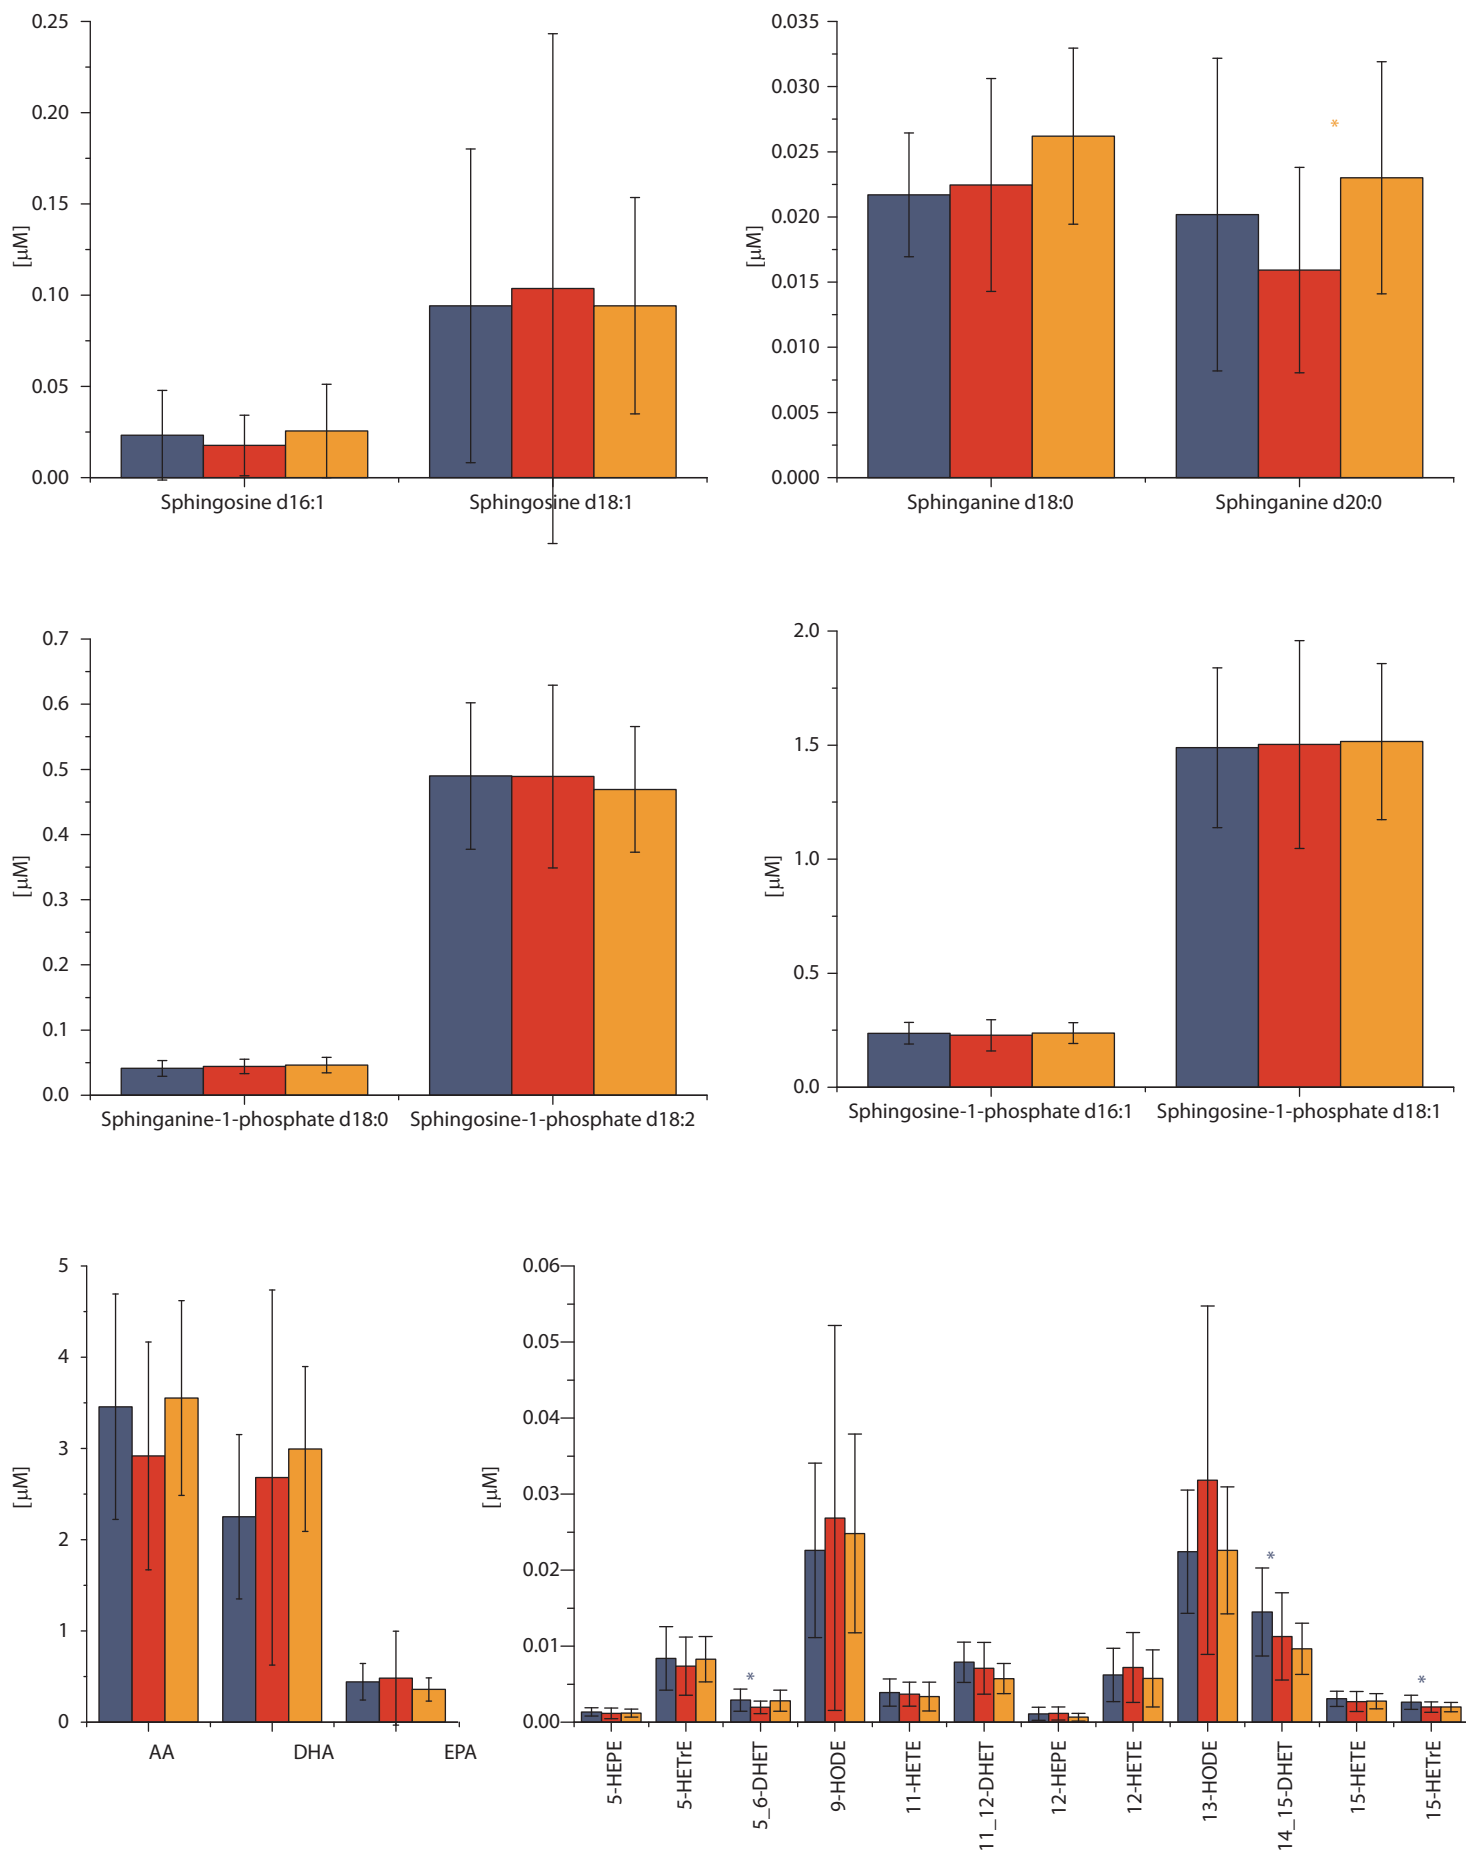

**Supplementary Figure S1. Concentrations of individual lipid species.** Comparison between males ( $n=36$ ), and nonCC-females ( $n=16$ ) (blue stars), and between nonCC-females ( $n=16$ ) and CC-females ( $n=19$ ) (orange stars). Data are the mean  $\pm$  SD. Statistic was performed by nonparametric Mann-Whitney test; Benjamini corrected. \* $p < 0.05$ ; \*\* $p < 0.01$ ; \*\*\* $p < 0.001$ .

## Supplementary Figure S2

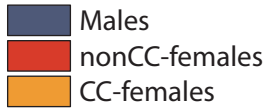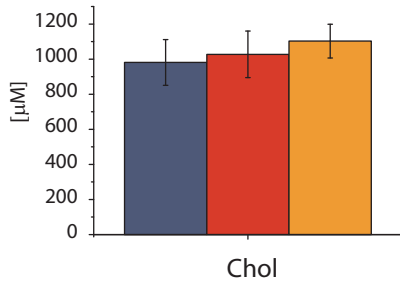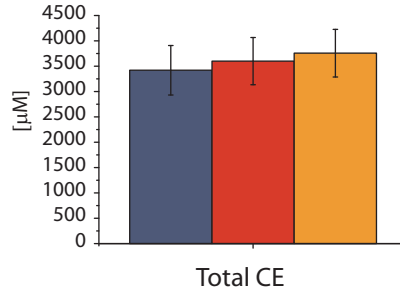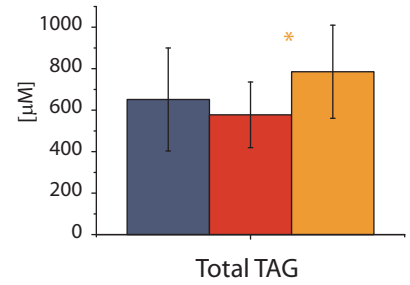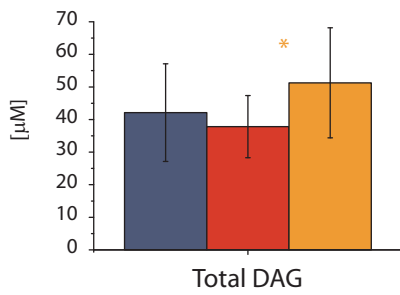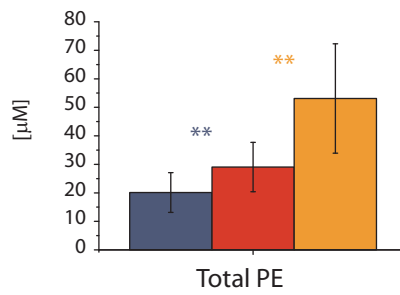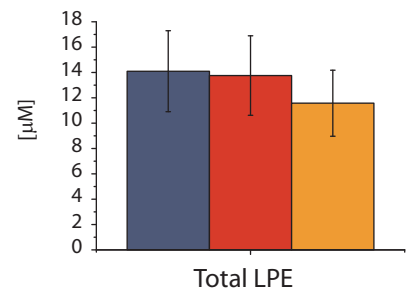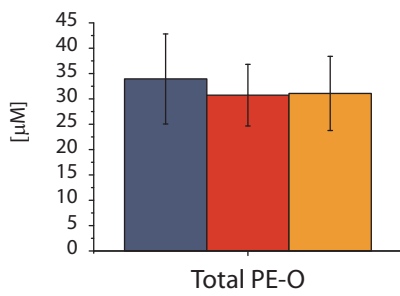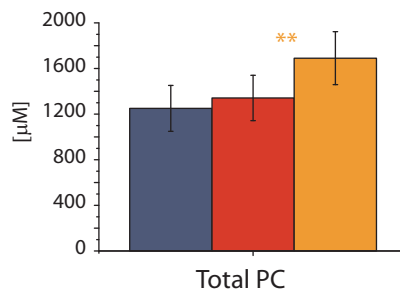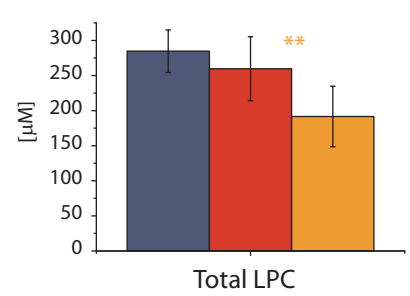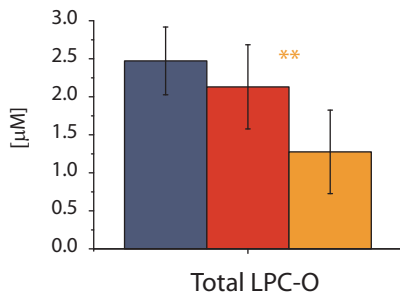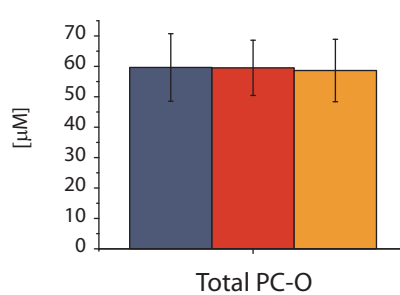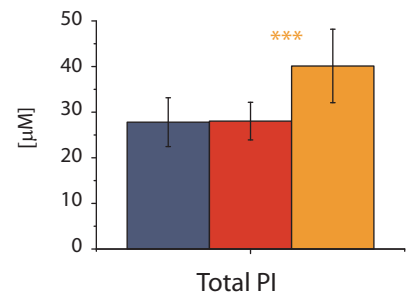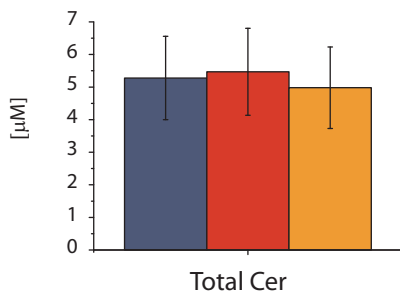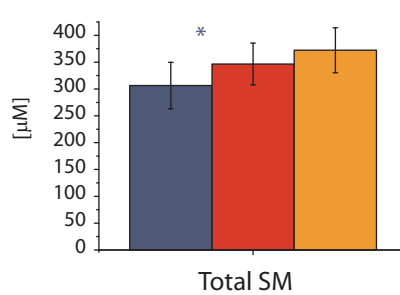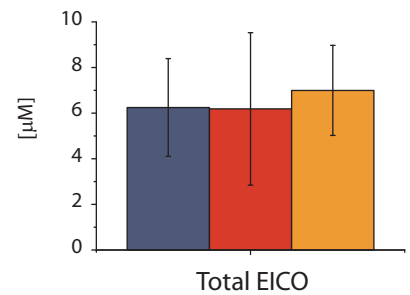

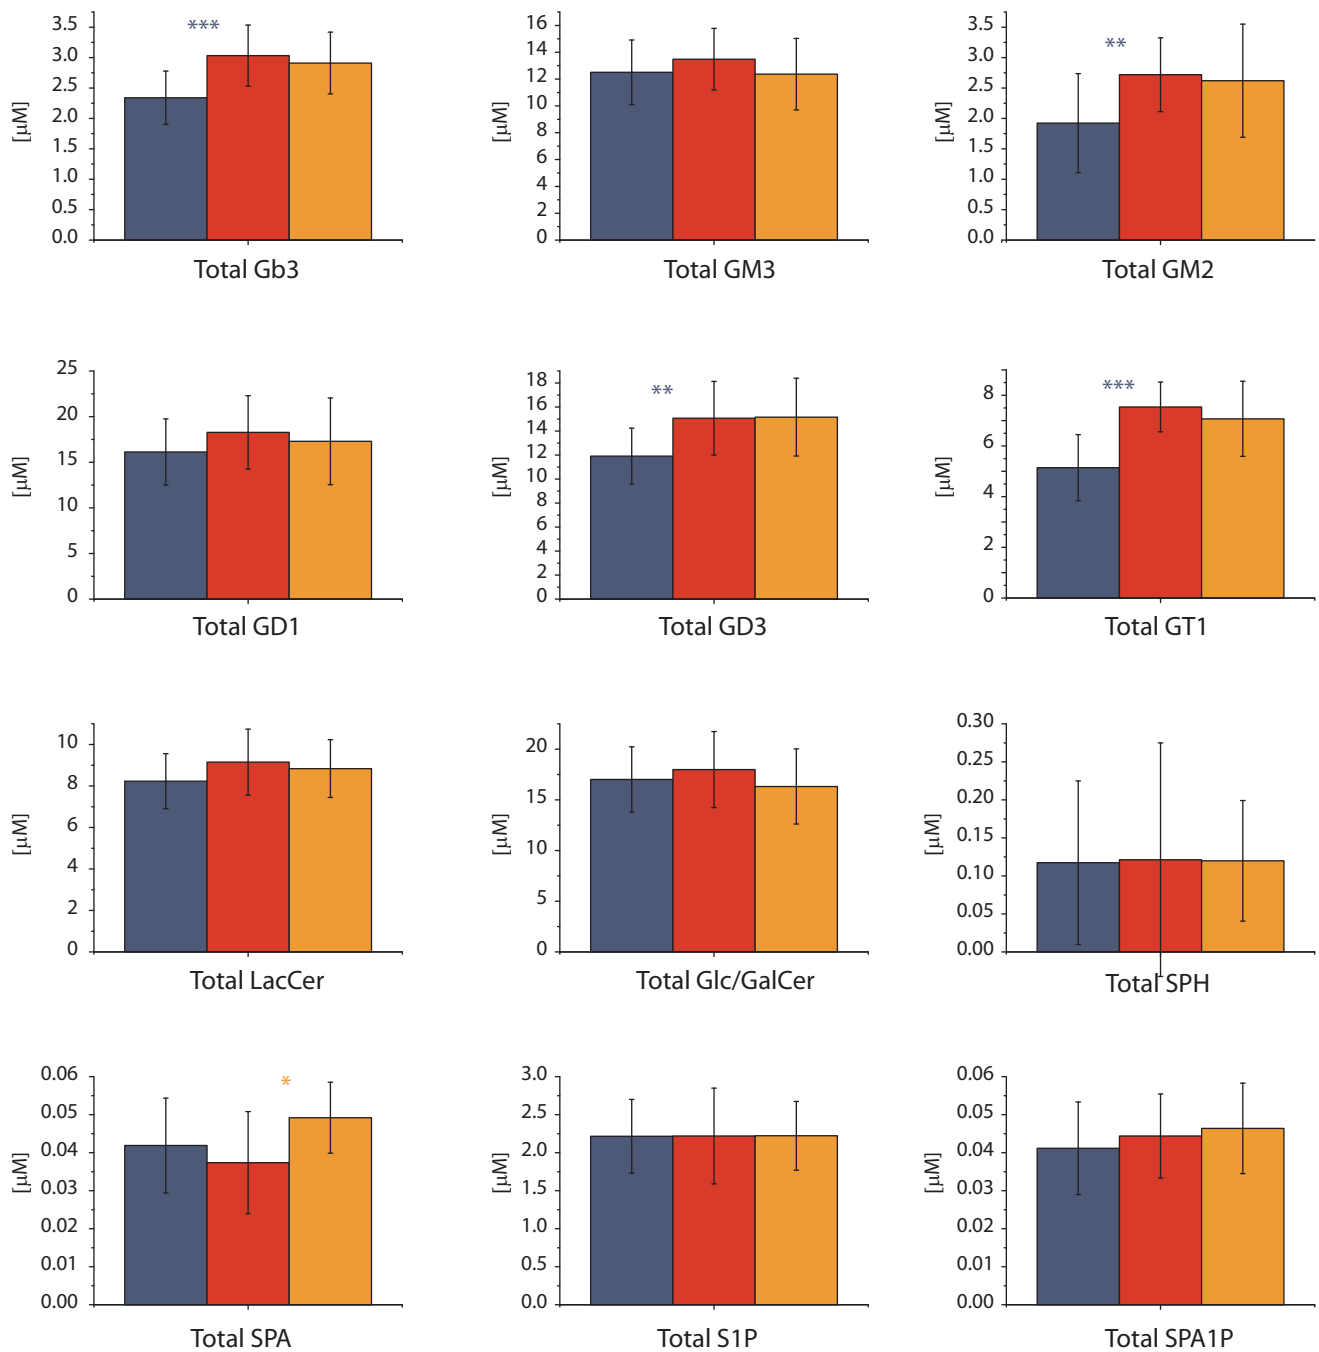

**Supplementary Figure S2. Total concentrations of lipid classes.** Comparison between males ( $n=36$ ), and nonCC-females ( $n=16$ ) (blue stars), and between nonCC-females ( $n=16$ ) and CC-females ( $n=19$ ) (orange stars). Data are the mean  $\pm$  SD. Statistics was performed by nonparametric Mann-Whitney test; Benjamini corrected. \* $p < 0.05$ ; \*\* $p < 0.01$ ; \*\*\* $p < 0.001$ .

### Supplementary Figure S3

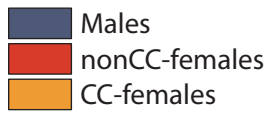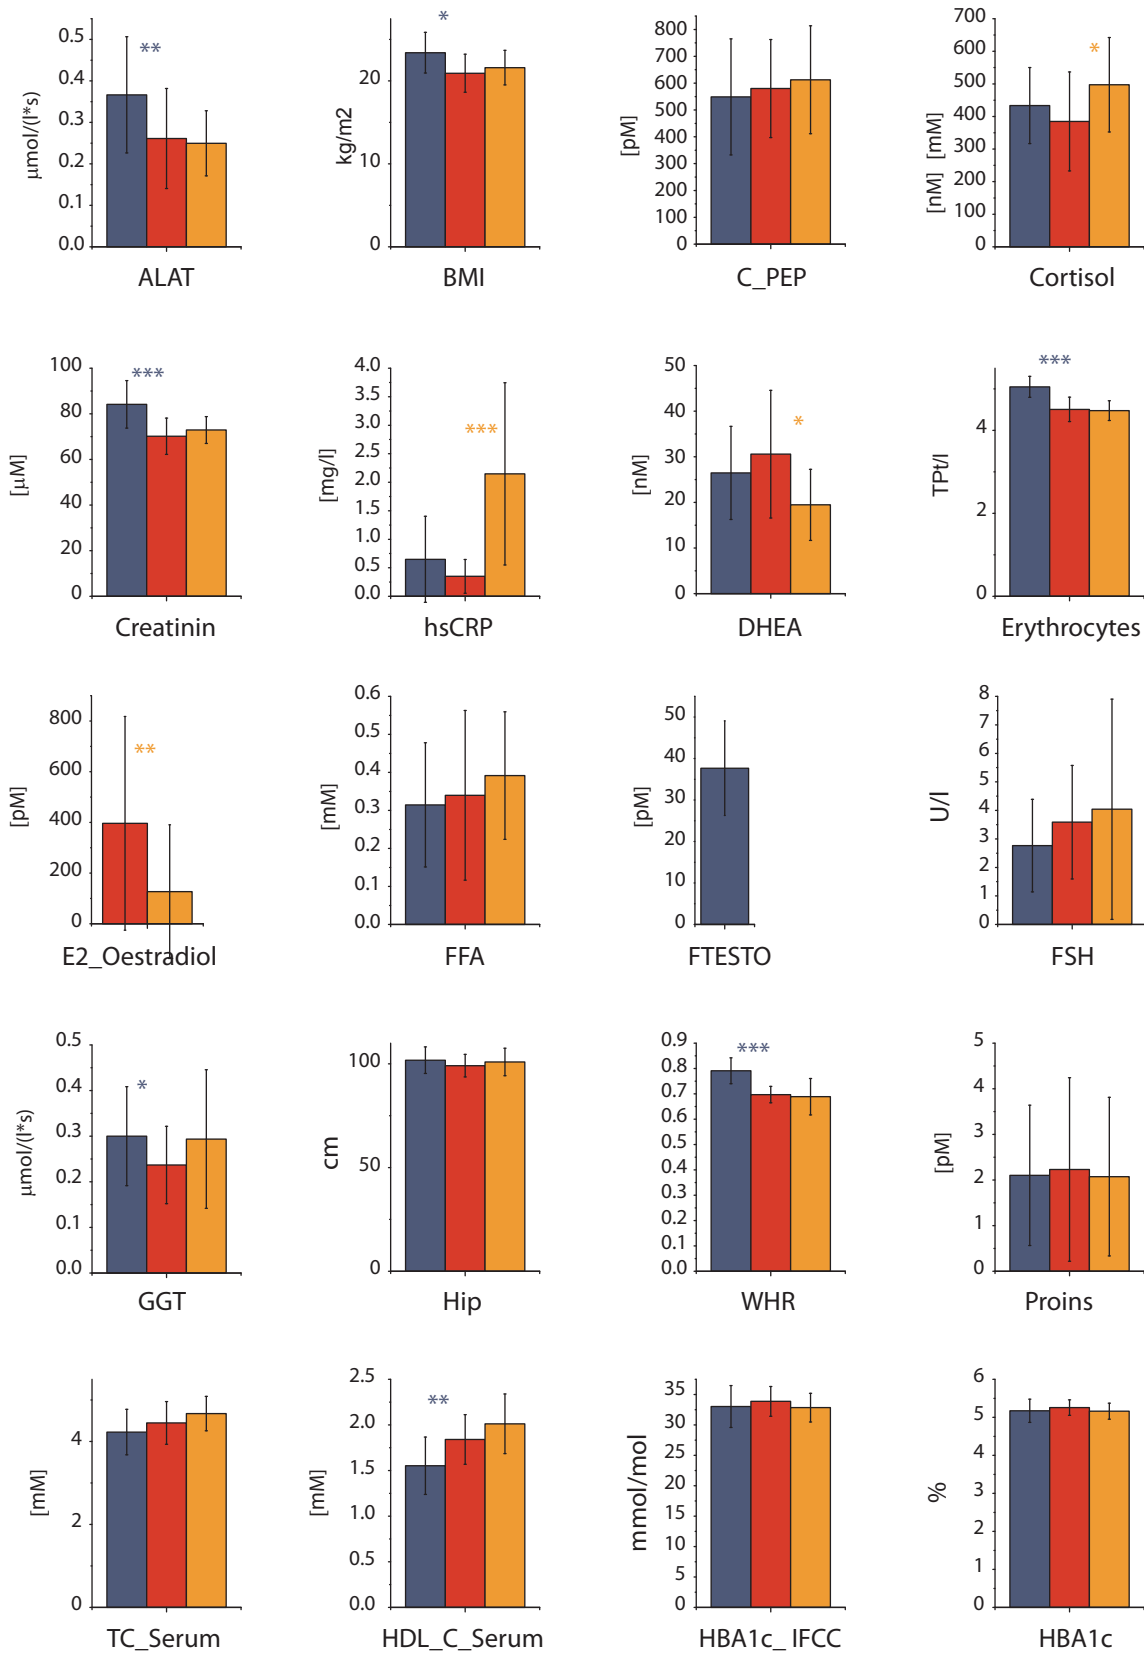

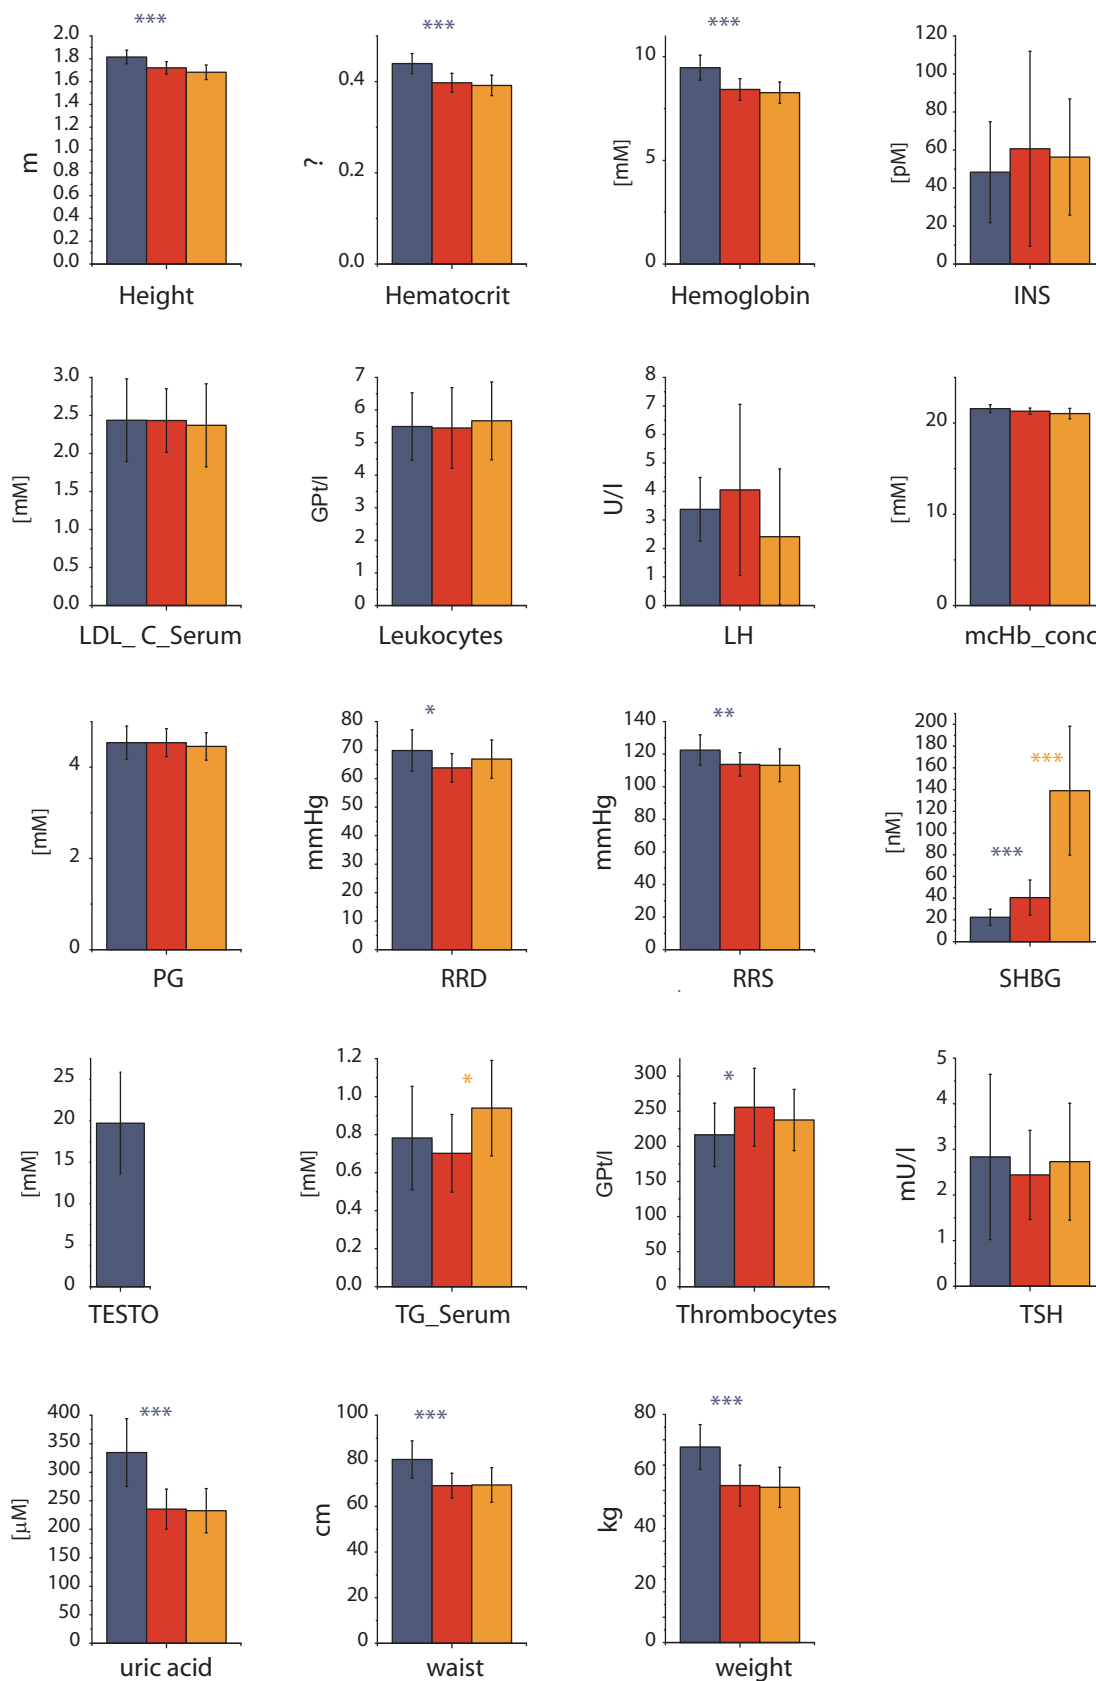

**Supplementary Figure S3. Values of clinical and anthropometric indices.** Comparison between males ( $n=36$ ), and nonCC-females ( $n=16$ ) (blue stars), and between nonCC-females ( $n=16$ ) and CC-females ( $n=19$ ) (orange stars). Data are the mean  $\pm$  SD. Statistic was performed by nonparametric Mann-Whitney test; Benjamini corrected. \* $p < 0.05$ ; \*\* $p < 0.01$ ; \*\*\* $p < 0.001$ .

## Supplementary Figure S4

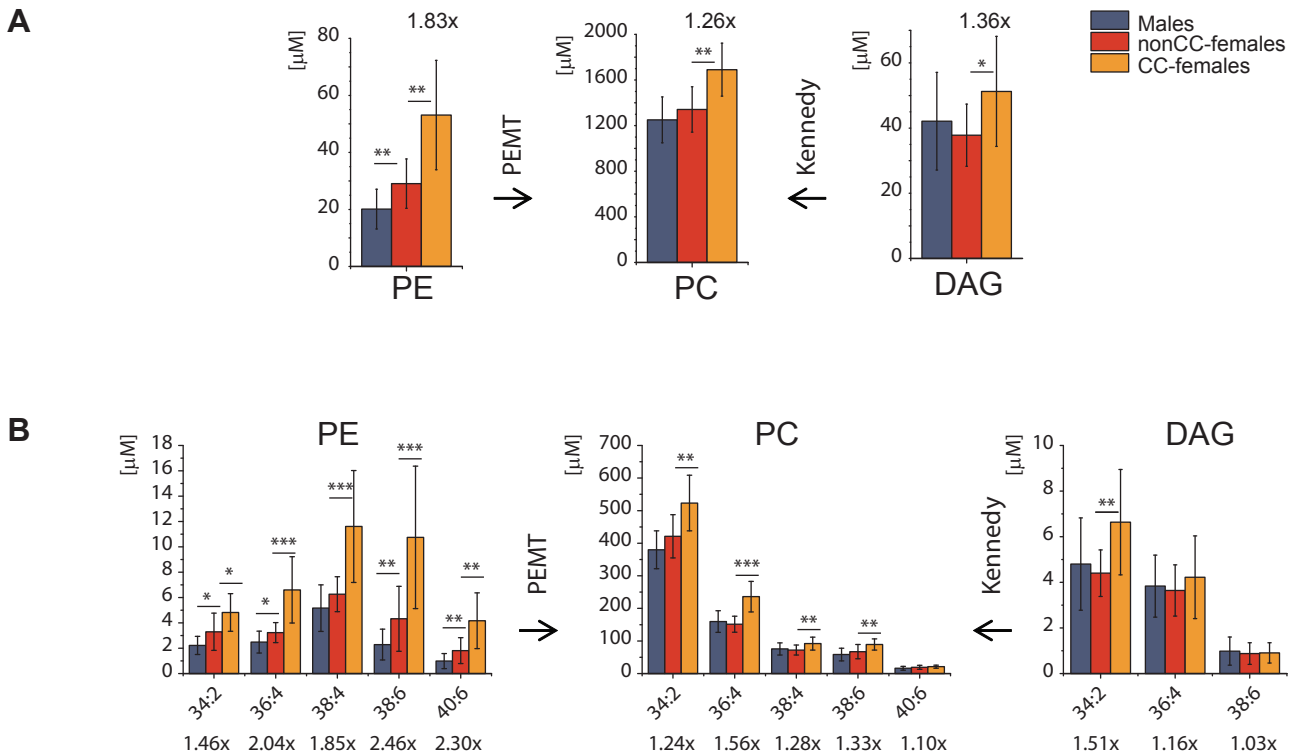

**Supplementary Figure S4. Estradiol-dependent and -independent regulation of lipid concentrations in plasma.** (A) Total concentration of DAG, PE, and PC in males ( $n=36$ ), nonCC-females ( $n=16$ ), and CC-females ( $n=19$ ). Fold differences between nonCC-females and CC-females are above the concentration bars. (B) Several abundant DAG, PE, and PC species and corresponding fold differences (shown below concentration bars) between nonCC-females and CC-females. Conversion of polyunsaturated PE species into corresponding PC is faster in nonCC-females compared to CC-females. \*  $p<0.05$ ; \*\*  $p<0.01$ ; \*\*\*  $p<0.001$  (nonparametric Mann-Whitney test; Benjamini corrected). Data are the mean  $\pm$  SD.
